# Supplementary material for: The Wnt signaling receptor Fzd9 is essential for Myc-driven tumorigenesis in pancreatic islets
Source: Life Sci Alliance. 2021 Mar 2;4(5):e201900490. doi: 10.26508/lsa.201900490 (PMC8008953; doi:10.26508/lsa.201900490)
Supplement: Supplementary file 1 [file LSA-2019-00490_TableS1.xls]

## Sheet: Supplementary Table 1
Supplementary Table 1: Multiple genes appear significantly upregulated and downregulated in the absence of Fzd9. List of top 70 downregulated (left table) and upregulated (right table) genes shown. The name of the gene (Gene Symbol), the statistical significance (p-value) and the fold-change are shown.
Top genes downregulated by Fzd9KO//KO				Top genes upregulated by Fzd9KO//KO
Gene Symbol	p-value	Fold-Change		Gene Symbol	p-value	Fold-Change
		(KO vs. WT)				(KO vs. WT)
Fosb	0.002	-11.651		Gm6866	0	2.782
Rgs2	0.003	-4.438		Olfr361	0.049	2.577
Fos	0.008	-4.071		Vmn1r40	0.042	2.303
Mir5124a	0.036	-3.954		Gm24261	0.034	2.253
Atf3	0.047	-3.692		Gm22284	0.01	2.238
Npas4	0.049	-3.496		Rnu3b1	0.033	2.124
Mir1938	0.026	-3.168		Rnu3b4	0.033	2.124
Jun	0	-2.748		Igkv8-16	0.009	2.053
Egr1	0.025	-2.736		Vmn2r81	0.01	2.018
Klf6	0.006	-2.589		Olfr1039	0.031	1.991
Irs2	0.026	-2.514		Olfr473	0.03	1.982
Junb	0.015	-2.369		Gm23999	0.021	1.973
Actb	0.014	-2.282		Gm23475	0.012	1.968
Rasd1	0.003	-2.278		Gm5662	0.028	1.95
Dusp5	0.022	-2.235		Serpina3h	0.024	1.945
Gm24318	0.042	-2.234		n-R5s218	0.036	1.937
Gm24044	0.04	-2.174		Traj16	0.044	1.937
Egr3	0.018	-2.168		Gm25390	0.001	1.929
Prelp	0.015	-2.141		Gm15448	0.02	1.917
Arrdc3	0.029	-2.049		Fam205a1	0.028	1.905
Rpl5	0.008	-1.979		Sectm1a	0.009	1.874
Herpud1	0.014	-1.974		Ifi27l2b	0.019	1.869
Polg2	0.007	-1.968		n-R5s167	0.033	1.86
Ahnak2	0.046	-1.945		LOC100125594	0.026	1.841
Ret	0.016	-1.934		Myl7	0.001	1.825
Ighv1-15	0.027	-1.914		Kbtbd12	0.034	1.817
Gm8399	0.024	-1.909		Trim31	0.002	1.795
Mir379	0.027	-1.873		Olfr503	0.022	1.795
Zfp810	0.005	-1.867		Snord66	0.035	1.794
Scnn1a	0	-1.865		Gm10754	0.03	1.785
Mnx1	0	-1.861		LOC105243413	0.032	1.783
Gm10490	0.002	-1.849		Olfr1406	0.01	1.776
Syt4	0.018	-1.839		Ifi204	0.029	1.773
Coq3	0.014	-1.838		Gstm4	0.044	1.773
Hck	0.024	-1.836		Olfr293	0.007	1.768
Gm19935	0.011	-1.819		Olfr243	0.025	1.768
Gm22816	0.016	-1.818		Vmn1r176	0.012	1.764
Per1	0.009	-1.814		Olfr314	0.023	1.763
Mt1	0.004	-1.812		Mir1968	0	1.751
C2cd4b	0.025	-1.806		Serpinb1c	0.034	1.746
Gm22981	0.014	-1.804		Gm11696	0.016	1.745
Gm22658	0.018	-1.78		Olfr1204	0.013	1.732
Mir670	0.035	-1.779		Olfr62	0.028	1.73
Sncg	0.026	-1.772		Gm6929	0.008	1.727
Kcnip3	0.024	-1.769		Gm22296	0.031	1.727
H2-T22	0.028	-1.763		Gm25253	0.048	1.721
Tuba1a	0.029	-1.753		Trdn	0.015	1.717
Lactb2	0.029	-1.747		Olfr284	0.039	1.717
Gm8882	0.011	-1.74		Gng4	0.001	1.715
Gm23712	0.023	-1.721		Ndufb11	0.041	1.712
Tnfrsf21	0.041	-1.718		Snhg7	0.011	1.712
Tmx4	0.025	-1.716		Gm22556	0.03	1.711
Zbtb10	0.008	-1.708		Gm16035	0.022	1.705
Gm25459	0	-1.706		Ugt2b38	0.009	1.705
Hsd3b1	0.028	-1.706		Olfr955	0.027	1.703
Gm23812	0.018	-1.705		Gm25280	0.004	1.701
Tiparp	0.008	-1.703		Olfr1377	0.008	1.696
Chaf1b	0.029	-1.702		Gm24718	0.016	1.695
Srf	0.018	-1.696		Gm12862	0.005	1.695
Olfr481	0.022	-1.693		Gm16130	0.02	1.692
Camkk1	0.024	-1.693		Zfp248	0.039	1.681
D16Ertd472e	0.039	-1.684		Kctd5	0.048	1.678
Gm25804	0.013	-1.683		LOC102634300	0.044	1.677
Dusp18	0.013	-1.679		Gm25465	0.008	1.667
Mirlet7e	0.043	-1.674		Gm14565	0.001	1.666
Btg1	0.049	-1.668		Gm25378	0.028	1.664
Gm12538	0.031	-1.663		Gm26176	0.02	1.664
Gm25862	0.043	-1.66		Olfr984	0.043	1.661
Phlda1	0.034	-1.642		Caps2	0.031	1.651
Hist1h3g	0.026	-1.641		Gm22236	0.023	1.65
